# Supplementary material for: Prevalence of hallux valgus in the general population: a systematic review and meta-analysis
Source: J Foot Ankle Res. 2010 Sep 27;3:21. doi: 10.1186/1757-1146-3-21 (PMC2955707; doi:10.1186/1757-1146-3-21)
Supplement: Additional file 4 — Studies included in meta-analysis, grouped by age of study population. [file 1757-1146-3-21-S4.XLS]

## Sheet: Sheet1
Additional file 4 - Studies included in meta-analysis, grouped by age of study population
						Total		Male		Female
Study ID	Reference number	Country	Sampling method	HV diagnosis	Study quality	N	Pr (%)	N	Pr (%)	N	Pr (%)
Overall population (all ages)
Adams (1991)	[32]	USA	R	SR	High	119631	1.3
Adams (1999)	[10]	USA	R	SR	High	63402	0.9
Brodie (1988)	[33]	UK	R	D	Low	700	11.9
Clarke (1969a)a	[34]	UK	R	SR	High	1095	13
Craigmile (1953a)a	[23]	UK	C	D	Low	358	27
Durman (1957a)a	[30]	USA	C	D	Low	178	5
Durman (1957b)a	[30]	USA	B	D	Low	395	49
Fridland (1960)	[24]	Russia	C	D	Low	119	16
Garrow (2004)	[35]	UK	R	SR	High	3047	8
Hughes (1990)	[25]	UK	C	D	Low	160	22.5
Jones (1992)	[31]	USA	B	D	High	161	13.7
Maclennan (1966)	[36]	New Guinea	R	D	High	1256	2.2
Mahrle (1965)	[75]	USA	NR	SR	Low	184	3.8
Marr (1998)	[37]	Australia	R	D	Low	400	13.3
Mays (2005)	[26]	UK	C	D	High	239	5.9
Morris (1978)	[27]	UK	C	D	Low	741	48
Muehleman (1997)	[28]	USA	C	D	High	50	14
Nancarrow (1999)	[38]	Australia	R	SR	Low	600	2.3
Podrushniak (1980)	[80]	Russia	NR	D	Low	1082	32.7
Robbins (1996a)a	[15]	USA	B	D	Low	51	33.3
Robbins (1996b)a	[15]	USA	B	D	Low	30	43.3
Shine (1965)	[39]	St Helena Is	R	D	High	1901	2
Sim-Fook (1958)	[29]	Hong Kong	C	D	Low	225	18.2
Wilder (1980)	[16]	USA	R	SR	High	197422	1.2
Juvenile (<18yrs)
Brodie (1988)	[33]	UK	R	D	Low	200	2.5	100	0c	100	5
Cole (1959)	[50]	USA	NR	D	Low	1080	36.7	372	24.8	708	56
Craigmile (1953b)a	[23]	UK	C	D	Low	12765	8.7	6931	4.9	5834	0c
Craigmile (1953c)a	[23]	UK	C	D	Low	164	18.9
Denvir (1972)	[55]	UK	C	D	Low	32245	5.3	16489	2.9	15756	7.9
Emslie (1939)	[59]	UK	NR	D	Low	281	11
Jerosch (1998)	[70]	Germany	C	D	High	345	17.1
Kemp (1984)	[71]	UK	C	D	Low	205	4.8
Kilmartin (1991)b	[72]	UK	NR	D	High	6000	1.6
Kilmartin (1991)b	[72]	UK	NR	D	High	6000	2.5
Kilmartin (1991)b	[72]	UK	NR	D	High	6000	5.2
Maclennan (1966)	[36]	New Guinea	R	D	High	661	0.9	355	0c	306	2
Marr (1985)	[76]	Australia	NR	D	Low	191	6.8	115	3.5	76	11.8
Oppel (1984)	[79]	Germany	NR	D	Low	4372	5.1	2069	2	2303	7.9
Smetisko (1989)	[85]	Serbia	NR	D	Low	100	9
Spahn (2004)	[86]	Germany	C	D	High	2368	2
Adult (18-65yrs)
Al-Abdulwahab (2000)	[45]	Saudi Arabia	C	D	High	100	39			100	39
Brodie (1988)	[33]	UK	R	D	Low	200	12	100	5	100	19
Cho (2009)	[49]	Korea	C	D	High	563	64.7
Clarke (1969a)a	[34]	UK	R	SR	High	929	10.9	456	2	473	19.5
Conrad (1977)	[51]	USA	C	D	Low	26	42.3
Craigmile (1953a)a	[23]	UK	C	D	Low	290	25.9	113	18.6	177	30.5
Dawson (2002)	[54]	UK	C	D	Low	96	38			96	38
Frey (1993)	[62]	USA	B	D	Low	356	54			356	54
Fridland (1960)	[24]	Russia	C	D	Low	52	13.5
Harris (1947)	[65]	Canada	C	D	High	3619	2.2	3619	2.2
Huang (2006)	[68]	China	C	D	High	319	6.9	156	5.8	163	8
Maclennan (1966)	[36]	New Guinea	R	D	High	570	3.7	290	2.1	280	5.4
Roddy (2008)	[9]	UK	C	SR	High	2150	21.3	833	13.8	1315	26
Schnitzer (1974)	[84]	USA	B	D	Low	14470	19.4	14470	19.4
Scott (2007)	[43]	Australia	C	D	High	50	2
Elderly (>65yrs)
Black (1987)	[48]	USA	C	SR	High	733	13.4	254	3.1	479	18.6
Brodie (1988)	[33]	UK	R	D	Low	200	27	100	19	100	35
Cartwright (1986)b	[17]	UK	R	SR	High	543	25	209	7	334	36
Cartwright (1986)b	[17]	UK	R	D	High	382	46
Chaiwanichsiri (2009)	[40]	Thailand	C	D	High	213	45.5	108	47.2	105	43.8
Clarke (1969a)a	[34]	UK	R	SR	High	166	24	65	6	101	35
Conrad (1977)	[51]	USA	C	D	Low	351	41
Crawford (1995)	[53]	UK	B	D	High	128	9	26	4	102	11
Dunn (2004)	[56]	USA	R	D	High	784	37.1	339	25.3	445	44.3
Ebrahim (1981)	[57]	UK	C	D	Low	100	29
Elton (1986)	[58]	UK	R	D	Low	1153	34	442	18	711	44
Evans (1991)	[61]	USA	C	D	High	79	21.5
Fridland (1960)	[24]	Russia	C	D	Low	25	24
Helfand (1963)b	[18]	USA	C	SR	Low	465	68.6
Helfand (1963)b	[18]	USA	C	D	Low	465	82.4
Helfand (1969)b	[19]	USA	C	SR	High	551	15.4	234	9.8	317	19.6
Helfand (1969)b	[19]	USA	C	D	High	551	37.6	234	29.1	317	43.8
Helfand (2004)b	[20]	USA	B	SR	High	1000	24
Helfand (2004)b	[20]	USA	B	D	High	1000	52.7
Helfand (1998)b	[21]	USA	C	SR	Low	417	24
Helfand (1998)b	[21]	USA	C	D	Low	417	51
Helfand (1996)b	[22]	USA	C	SR	Low	88	31
Helfand (1996)b	[22]	USA	C	D	Low	88	57
Horvath (1980)	[67]	Germany	NR	D	Low	680	35.9	246	19.1	434	45.4
Hung (1985)	[69]	Hong Kong	C	D	High	166	20	66	22	100	19
Leveille (1998)	[73]	USA	R	D	High	990	70			990	70
Maclennan (1966)	[36]	New Guinea	R	D	High	25	4	20	5
Menz (2001a)	[11]	Australia	C	D	High	135	74
Menz (2007)	[42]	Australia	C	D	High	292	28
Merrill (1967)	[77]	USA	C	D	High	1101	23.2	300	7	711	30
Munro (1998)	[78]	Australia	R	SR	High	128	17.2	60	8	68	25
Robinson (1989)	[81]	Australia	C	D	Low	454	40.4
Roddy (2008)	[9]	UK	C	SR	High	1708	43	772	29.2	938	54.4
Saez Aldana (1999)	[82]	Argentina	NR	D	Low	152	29
Schank (1977)	[83]	USA	C	SR	Low	125	22.4
Scott (2007)	[43]	Australia	C	D	High	50	60
White (1989)	[87]	UK	C	D	High	96	34
Pr = prevalence (%), R = random sampling, C = convenience sampling, B = biased sampling, NR = not reported, SR = self-reported hallux valgus (HV), D = HV diagnosed by clinical examination
a Paper reported prevalence data from more than one sample population
b Study reported more than one prevalence estimate based on different diagnostic methods in the same sample population (e.g. self-reported vs. diagnosed HV)
c Prevalence estimates of 0.0% were automatically excluded from analysis by the statistical software package (Stata version 10)
